# Supplementary material for: Reductive fractionation of woody biomass into lignin monomers and cellulose by tandem metal triflate and Pd/C catalysis
Source: Royal Society of Chemistry journal article supplement (doi:10.1039/c6gc02962k), 2016-12-02
Supplement: c6gc02962k1.pdf [file c6gc02962k1.pdf]

Supporting Information for

## **Reductive fractionation of woody biomass into lignin monomers and cellulose by tandem metal triflate and Pd/C catalysis**

Xiaoming Huang,<sup>a</sup> Olivia M. Morales Gonzalez,<sup>a</sup> Jiadong Zhu,<sup>a</sup> Tamás I. Korányi,<sup>a</sup> Michael D. Boot,<sup>b</sup> and Emiel J.M. Hensen\*,<sup>a</sup>

<sup>a</sup> Schuit Institute of Catalysis, Inorganic Materials Chemistry, Eindhoven University of Technology, P.O. Box 513, 5600 MB Eindhoven (The Netherlands),

<sup>b</sup> Combustion Technology, Department of Mechanical Engineering, Eindhoven University of Technology, P.O. Box 513, 5600 MB Eindhoven (The Netherlands)

\* Correspondence to: e.j.m.hensen@tue.nl

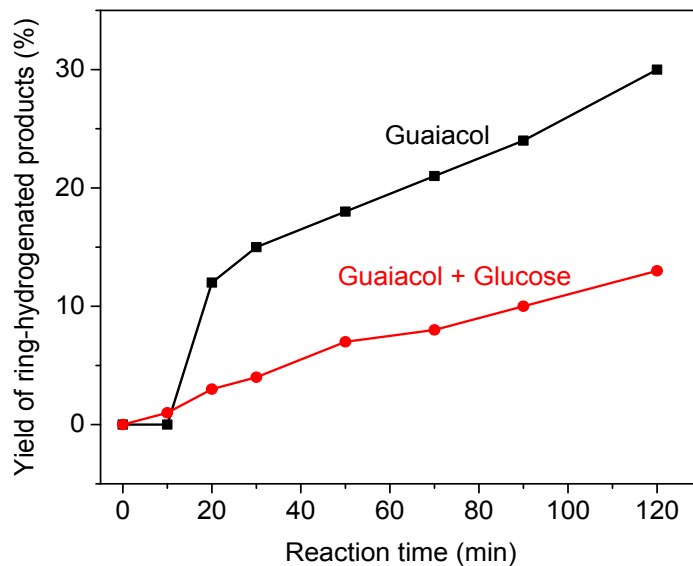

**Figure S1** Yield of ring-hydrogenated products obtained from hydrogenation reaction of Guaiacol (black) and Guaiacol + Glucose (red) in methanol in presence of Pd/C catalyst at 160 °C for 2 h.

Figure S1 shows the yield of ring-hydrogenated products as function of reaction time. The results attest to the lower rate of ring hydrogenation of guaiacol in the presence of sugars. Therefore, we can conclude that the presence of hydroxyl-rich sugars in the reaction mixture play a role in suppressing to a significant extent ring hydrogenation of the aromatic monomer products.
